# Supplementary material for: Integrated approaches to health
Source: Atypon-hosted journal article supplement (doi:10.3920/978-90-8686-875-9), 2018-01-01
Supplement: neoh_esm_2_guidelines+and+searchable+impact+evaluation+databases.pdf [file %20neoh_esm_2_guidelines+and+searchable+impact+evaluation+databases.pdf]

Supplementary online material of ‘Integrated approaches to health: a handbook for the evaluation of One Health’  
(<https://doi.org/10.3920/978-90-8686-875-9>)

## Guidelines and searchable impact evaluation databases

Supplement to Chapter 3, Section 3.4.4 of the NEOH handbook.

|                                                                                                                                                                                                                   |
|-------------------------------------------------------------------------------------------------------------------------------------------------------------------------------------------------------------------|
| Abdul Latif Jameel Poverty Action Lab: Evaluations and Innovations for Poverty Action (IPA): Search Projects<br><a href="https://www.povertyactionlab.org/">https://www.povertyactionlab.org/</a>                 |
| African Development Bank: Evaluation Reports<br><a href="https://www.afdb.org/en/documents/evaluation-reports/">https://www.afdb.org/en/documents/evaluation-reports/</a>                                         |
| Asian Development Bank: Independent Evaluation's Evaluation Resources<br><a href="https://www.adb.org/site/evaluation/main">https://www.adb.org/site/evaluation/main</a>                                          |
| UK Department for International Development (DFID): Evaluation Reports<br><a href="https://www.gov.uk/government/collections/evaluation-reports">https://www.gov.uk/government/collections/evaluation-reports</a> |
| Inter-American Development Bank: Office of Evaluation and Oversight<br><a href="https://www.iadb.org/en/evaluation">https://www.iadb.org/en/evaluation</a>                                                        |
| International Initiative for Impact Evaluation (3ie)<br><a href="http://www.3ieimpact.org/">http://www.3ieimpact.org/</a>                                                                                         |
| UK Medical Research Council (MRC)<br><a href="https://mrc.ukri.org/">https://mrc.ukri.org/</a>                                                                                                                    |
| US Millennium Challenge Corporation<br><a href="https://www.mcc.gov/">https://www.mcc.gov/</a>                                                                                                                    |
| OECD Development Assistance Committee: Evaluation Resource Center (DEReC)<br><a href="http://www.oecd.org/derec/">http://www.oecd.org/derec/</a>                                                                  |
| USAID - Development Experience Clearinghouse<br><a href="https://dec.usaid.gov/dec/home/">https://dec.usaid.gov/dec/home/</a>                                                                                     |
| World Bank<br><a href="http://www.worldbank.org/">http://www.worldbank.org/</a>                                                                                                                                   |
